# Supplementary material for: Sponge integrated highly compressible all-solid-state supercapacitor with superior performance
Source: Royal Society of Chemistry journal article supplement (doi:10.1039/c7nj02976d), 2017-01-01
Supplement: c7nj02976d1.pdf [file c7nj02976d1.pdf]

## Supplementary Information

### Sponge integrated highly compressible all-solid-state supercapacitor with superior performance

Enke Feng, Guofu Ma\*, Hui Peng, Fengting Hua, Wei Tang, Ziqiang Lei\*

*Key Laboratory of Eco-Environment-Related Polymer Materials of Ministry of Education, Key*

*Laboratory of Polymer Materials of Gansu Province, College of Chemistry and Chemical Engineering,*

*Northwest Normal University, Lanzhou 730070, China.*

\*Corresponding authors: magf@nwnu.edu.cn; leizq@nwnu.edu.cn.

#### Experimental materials:

Aniline (Shanghai Chemical Works, China) and Pyrrole (Aladdin Co., China) were distilled under reduced pressure. Sodium carboxymethyl cellulose (CMC, Tianjin Yuanli Chemical Co., China), *P*-toluenesulfonic acid (*P*-TSA, Aladdin Co., China). Ammonium persulfate (APS, Tianjin Damao Chemical Co., China). Polyvinyl alcohol (PVA,  $M_w = 44.05 M_w$ , Aladdin Co., China).  $\text{LiClO}_4$  (Aladdin Co., China), and the other reagents were all analytical grade and were used as received without further treatment.

#### Calculation methods:

The specific capacitance ( $C_M$ ,  $\text{F g}^{-1}$ ) and volumetric capacitance ( $C_V$ ,  $\text{F cm}^{-3}$ ) of the devices were calculated from their GCD curves according to the following equation:<sup>1</sup>

$$C_M = \text{Idt}/m\text{dV} \quad (1) \quad \text{and} \quad C_V = \text{Idt}/V\text{dV} \quad (2)$$

where  $I$  (A) is the constant current,  $\Delta t$  (s) is the discharge time,  $m$  (g) is the total mass of the active material in both electrodes,  $V$  (cm<sup>3</sup>) is the volume of the whole device, and  $\Delta V$  (V) is the actual voltage excluding IR drop of the discharge process.

According to  $C_M$  (F g<sup>-1</sup>) of a supercapacitor device,  $C_m$  (F g<sup>-1</sup>) of a single electrode could be estimated as:<sup>2</sup>

$$C_m = 4C_M \quad (3)$$

The energy density ( $E$ , Wh kg<sup>-1</sup>) and power density ( $P$ , W kg<sup>-1</sup>) of the devices were calculated using the following equations:<sup>1</sup>

$$E = 1/2 C_M \Delta V^2 \quad \text{and} \quad P = E/\Delta t \quad (4)$$

The volumetric energy density ( $E$ , mWh cm<sup>-3</sup>) and power density ( $P$ , mW cm<sup>-3</sup>) of the devices were obtained from the following equations:<sup>3</sup>

$$E = 1/2 C_V \Delta V^2 \quad \text{and} \quad P = E/\Delta t \quad (5)$$

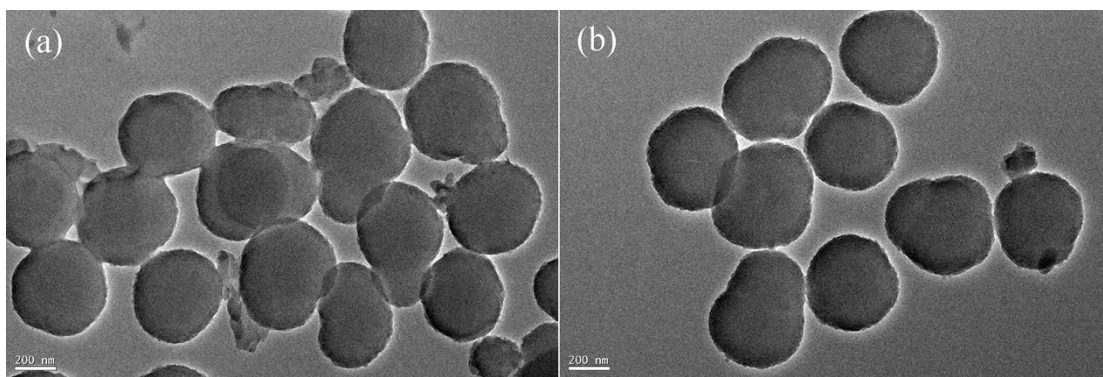

**Fig. S1.** (a) and (b) TEM images of the PANI based carbon nanospheres.

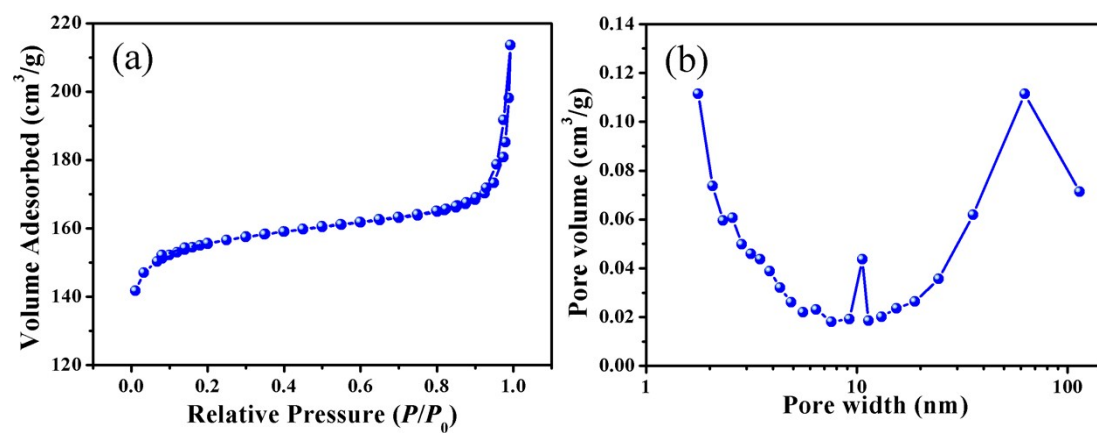

**Fig. S2.** (a) and (b) Nitrogen adsorption-desorption isotherms and pore-size distributions of the PANI based carbon nanospheres.

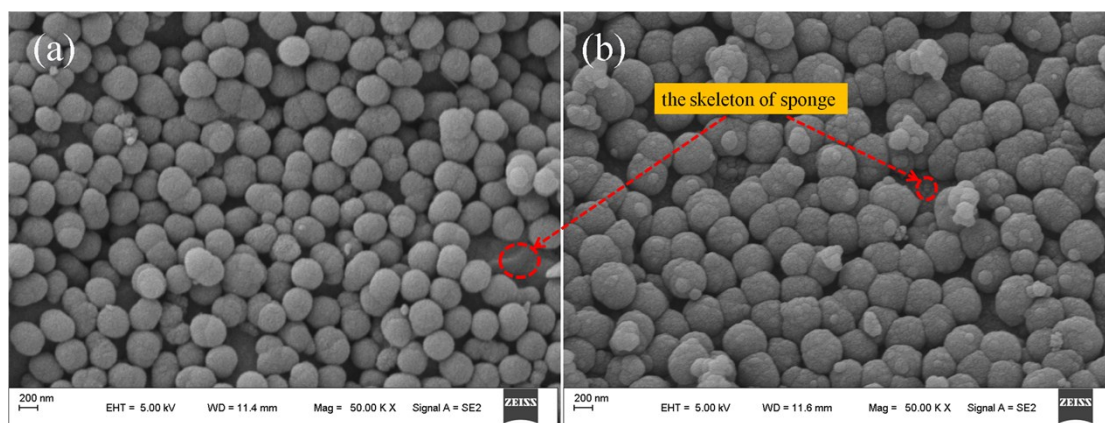

**Fig. S3.** (a) and (b) High magnification SEM images of PANI based carbon nanospheres coated sponge and PPy wrapped PANI based carbon nanospheres coated sponge.

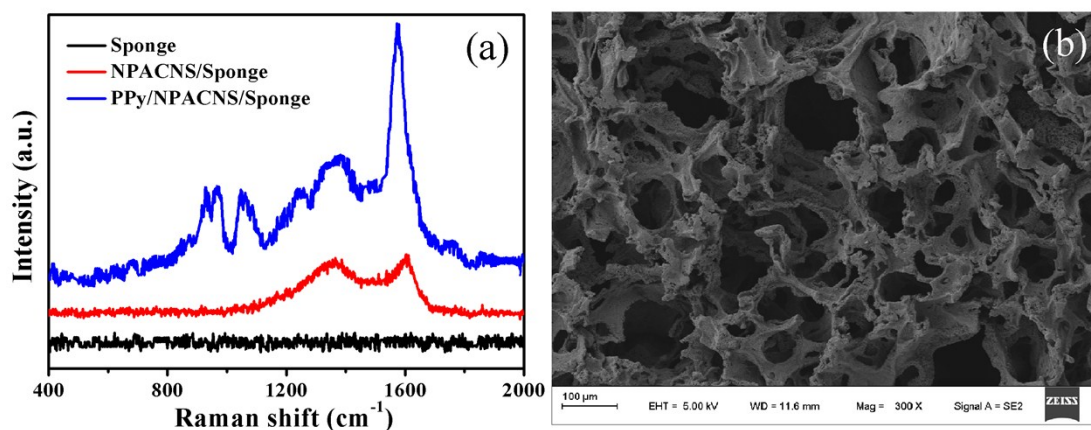

**Fig. S4.** (a) Raman spectra of the bare commercial sponge, PANI based carbon nanospheres coated sponge, and PPy wrapped PANI based carbon nanospheres coated sponge. (b) SEM image of PVA/LiClO<sub>4</sub> gel electrolyte coated on PPy/NPACNS/sponge electrode.

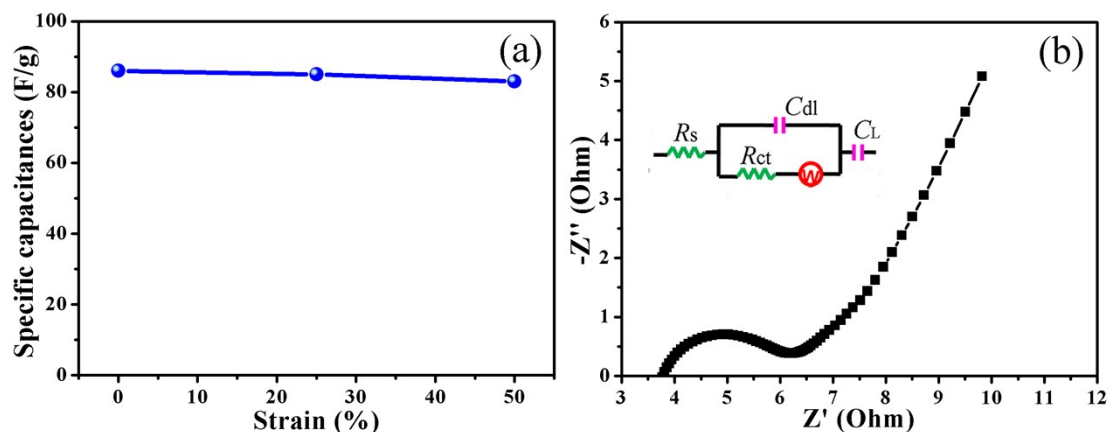

**Fig. S5.** (a) The specific capacitances of as-fabricated compressible all-solid-state supercapacitor under various compressing states. (b) The Nyquist impedance plot of as-fabricated compressible all-solid-state supercapacitor, and the inset showed an equivalent circuit used to fit the Nyquist spectra.

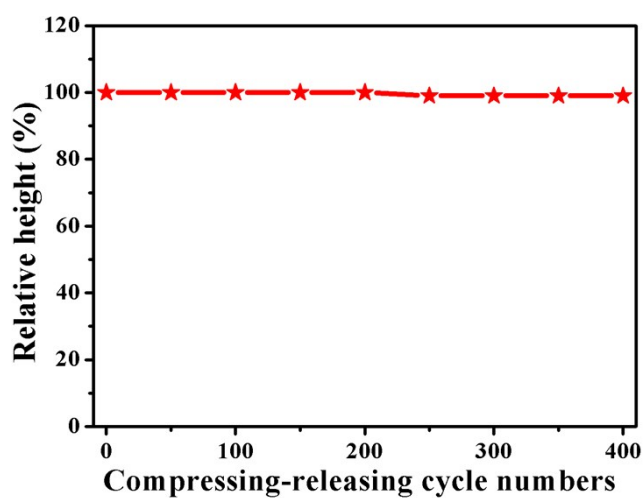

**Fig. S6.** The relative height variation of as-fabricated compressible all-solid-state supercapacitor as a function of compressing-releasing cycle numbers at maximum strain of 50%.

## References

1. K. Xiao, L. X. Ding, G. Liu, H. Chen, S. Wang and H. Wang, *Adv. Mater.*, 2016, **28**, 5997-6002.
2. J. Chen, J. Xu, S. Zhou, N. Zhao and C. P. Wong, *Nano Energy*, 2016, **25**, 193-202.
3. C. Yang, L. L. Zhang, N. T. Hu, Z. Yang, H. Wei and Y. F. Zhang, *J. Power Sources*, 2016, **302**, 39-45.
